# Supplementary material for: Transfer hydrogenation of ketones by ceria-supported Ni catalysts
Source: Royal Society of Chemistry journal article supplement (doi:10.1039/c2gc35836k), 2012-01-01
Supplement: c2gc35836k.pdf [file c2gc35836k.pdf]

## Supporting Information

### Transfer hydrogenation of ketones by ceria-supported Ni catalyst

Katsuya Shimura and Ken-ichi Shimizu\*

Catalysis Research Center, Hokkaido University, N-21, W-10, Sapporo 001-0021, Japan

\*Corresponding author: e-mail: [kshimizu@cat.hokudai.ac.jp](mailto:kshimizu@cat.hokudai.ac.jp), Fax: +81-11-706-9163

## Experimental

### General

The GC (Shimadzu GC-14B) and GCMS (Shimadzu GCMS-QP5000) analyses were carried out with a Rtx-65 capillary column (Shimadzu) using nitrogen or helium as the carrier gas. Commercially available organic and inorganic compounds were used without further purification.

### Catalyst preparation

CeO<sub>2</sub> (JRC-CEO-2), TiO<sub>2</sub> (JRC-TIO-4) and SiO<sub>2</sub>-Al<sub>2</sub>O<sub>3</sub> (JRC-SAL-2, Al<sub>2</sub>O<sub>3</sub> = 13.75 wt%, 560 m<sup>2</sup> g<sup>-1</sup>) were supplied from Catalysis Society of Japan.  $\gamma$ -Al<sub>2</sub>O<sub>3</sub> (with surface area of 124 m<sup>2</sup> g<sup>-1</sup>) was prepared by calcination of  $\gamma$ -AlOOH (Catapal B Alumina purchased from Sasol) at 900 °C for 3 h. ZrO<sub>2</sub> (60 m<sup>2</sup> g<sup>-1</sup>) was prepared by hydrolysis of zirconium oxynitrate 2-hydrate in distilled water by gradually adding an aqueous NH<sub>4</sub>OH solution (1.0 mol dm<sup>-3</sup>), filtration of precipitate, washing with distilled water three times, drying at 100°C, and calcining at 500°C. SiO<sub>2</sub> (Q-10, 300 m<sup>2</sup> g<sup>-1</sup>) was supplied from Fuji Silysia Chemical Ltd.

Supported Ni catalysts were prepared by an impregnation method. A mixture of support and an aqueous solution of Ni nitrates were evaporated at 60°C, followed by drying at 90°C for 12 h, calcination in air at 350°C for 4 h, and reduction in H<sub>2</sub> at 500°C for 30 min. These catalysts were used for reaction without being exposed to air.

M/CeO<sub>2</sub> (M = Cu, Co, Ru and Pd) catalysts, with metal loading of 5 wt% were prepared by impregnation method using aqueous solution of metal nitrates (for Cu and Co), RuCl<sub>3</sub>, or aqueous HNO<sub>3</sub> solution of Pd(NO<sub>3</sub>)<sub>2</sub>. These catalyst precursors were dried at 90°C for 12 h, followed by calcination in air at 350°C for 4 h, and reduction in H<sub>2</sub> at 500°C for 30 min. These catalysts were used reaction without being exposed to air.

### Typical procedures of catalytic reactions

NiO/CeO<sub>2</sub> (1-3 mol% of Ni with respect to ketone) inside the glass tube was reduced in a flow of H<sub>2</sub> (55 mL min<sup>-1</sup>) at 500°C for 0.5 h. After cooling it to room temperature in a flow of H<sub>2</sub>, the mixture of 2-propanol (1.5 mL) and ketone (1.0 mmol) was injected through a rubber. Then, the

reactor was purged by N<sub>2</sub> and set in a reaction vessel equipped with a condenser. The resulting mixture was stirred and heated at 85°C (reflux condition). Conversion and yields of products were determined by GC-FID using *n*-dodecane as an internal standard. The products were identified by GC-MS equipped with the same column as GC and by comparison with commercially pure products.

### Characterization

Ni K-edge XAFS measurements were performed in a transmission mode at the BL01B1 in the SPring-8. The storage ring was operated at 8 GeV. A Si(111) single crystal was used to obtain a monochromatic X-ray beam. Pre-reduced samples were sealed in cells made of polyethylene under N<sub>2</sub> atmosphere and XAFS spectra were taken at room temperature. The analysis of EXAFS was performed using the REX version 2.5 program (RIGAKU). The Fourier transformation of the *k*<sup>3</sup>-weighted EXAFS oscillation from *k* space to *r* space was performed over the range 30-140 nm<sup>-1</sup> to obtain a radial distribution function. The inversely Fourier filtered data were analyzed with a usual curve fitting method in the *k* range of 30-140 nm<sup>-1</sup>. The parameters for the Ni-O and Ni-Ni shells have been provided by the FEFF6.

CO<sub>2</sub>-TPD measurements were carried out using BELCAT-A (BEL Japan, Inc.). Prior to each experiment, catalyst (0.1 g) was heated in a flow of He (20 mL min<sup>-1</sup>) at 500°C for 10 min, followed by cooling to ca. 40°C under He flow. Then, the catalyst was exposed to a flow of CO<sub>2</sub> (20 mL min<sup>-1</sup>) for 10 min. After purged in He for 30 min, the catalyst was heated linearly at 10°C min<sup>-1</sup> until 900°C in a flow of He, and outlet gases (CO<sub>2</sub>, *m/e*=44) were analyzed by the mass spectrometer (BEL Mass, BEL Japan, Inc.).

In situ IR spectra were recorded on a JASCO FT/IR-6100 equipped with a quartz IR cell connected to a conventional flow reaction system. The sample was pressed into a 50 mg of self-supporting wafer and mounted into the quartz IR cell with CaF<sub>2</sub> windows. Spectra were measured accumulating 20 scans at a resolution of 4 cm<sup>-1</sup>. A reference spectrum of the catalyst wafer in He taken at measurement temperature was subtracted from each spectrum. Prior to each experiment the catalyst disk was heated in 10% O<sub>2</sub>/He flow (100 cm<sup>3</sup> min<sup>-1</sup>) at 550°C for 0.5 h, followed by cooling to the desired temperature and purging for 0.5 h in He.

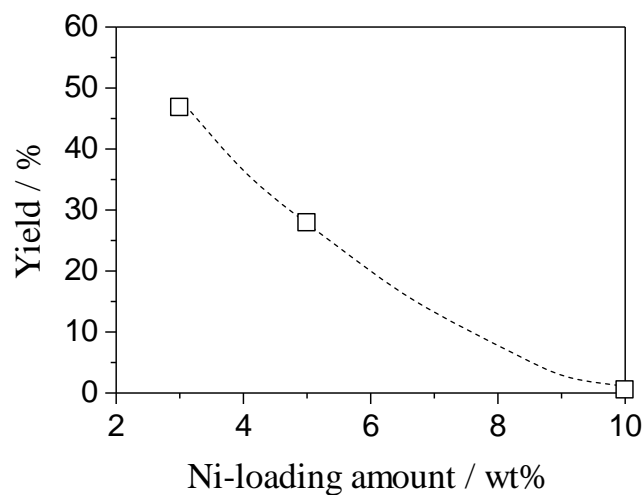

**Fig. S1** Effect of Ni loading on the yield of 2-octanol for transfer hydrogenation of 2-octanone by Ni/CeO<sub>2</sub> catalysts (1 mol%) at 80°C for 3 h.

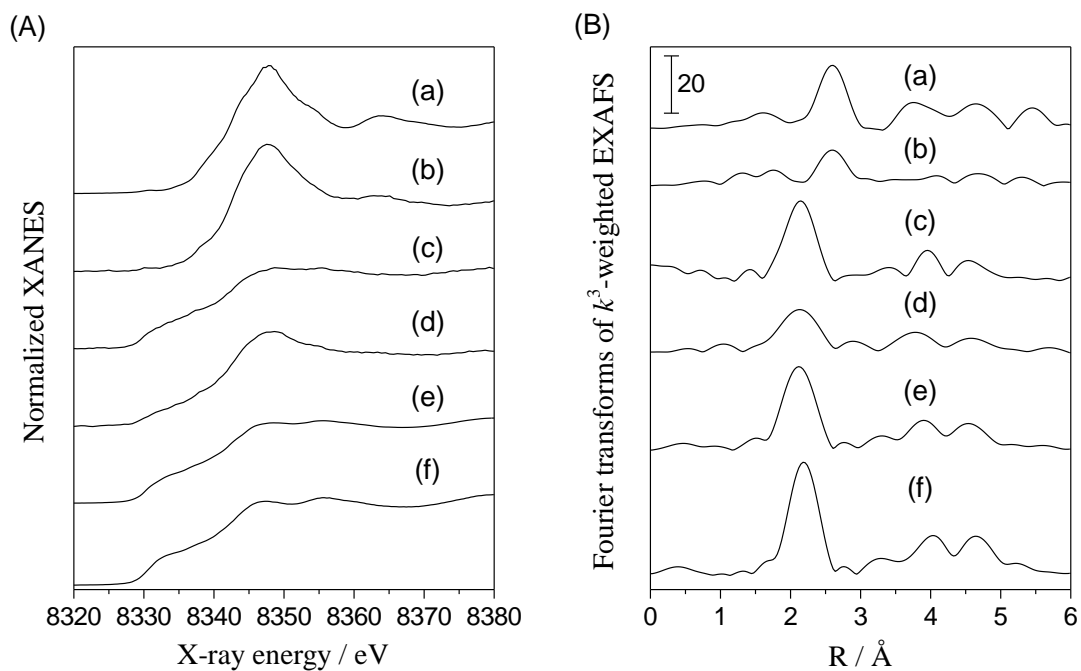

**Fig. S2** (A) Ni K-edge XANES spectra and (B) the Fourier transforms of EXAFS spectra of Ni(5 or 10 wt%)/CeO<sub>2</sub> and reference compounds: (a) NiO, (b) NiO(5%)/CeO<sub>2</sub>, (c) Ni(5%)/CeO<sub>2</sub>, (d) Ni(5%)/CeO<sub>2</sub>-air, (e) Ni(10%)/CeO<sub>2</sub> and (f) Ni foil.

**Table S1** Curve-fitting analysis of Ni K-edge EXAFS of Ni(5 or 10 wt%)/CeO<sub>2</sub> samples

| Sample                       | Shell | N <sup>a</sup> | R / Å <sup>b</sup> | σ / Å <sup>c</sup> | R <sub>f</sub> / % <sup>d</sup> |
|------------------------------|-------|----------------|--------------------|--------------------|---------------------------------|
| NiO(5%)/CeO <sub>2</sub>     | O     | 7.5            | 2.06               | 0.118              | 2.47                            |
|                              | Ni    | 6.0            | 2.95               | 0.073              |                                 |
| Ni(5%)/CeO <sub>2</sub>      | Ni    | 7.5            | 2.47               | 0.065              | 0.57                            |
| Ni(5%)/CeO <sub>2</sub> -air | O     | 2.7            | 2.08               | 0.094              | 0.30                            |
|                              | Ni    | 7.1            | 2.49               | 0.090              |                                 |
| Ni(10%)/CeO <sub>2</sub>     | Ni    | 8.9            | 2.47               | 0.072              | 0.51                            |
| NiO <sup>e</sup>             | O     | 6              | 2.02               | -                  | -                               |
|                              | Ni    | 12             | 2.94               | -                  | -                               |
| Ni foil <sup>e</sup>         | Ni    | 12             | 2.49               | -                  | -                               |

<sup>a</sup> Coordination number. <sup>b</sup> Bond distance. <sup>c</sup> Debye-Waller factor. <sup>d</sup> Residual factor. <sup>e</sup> Crystallographic data of Ni oxide and Ni metal.

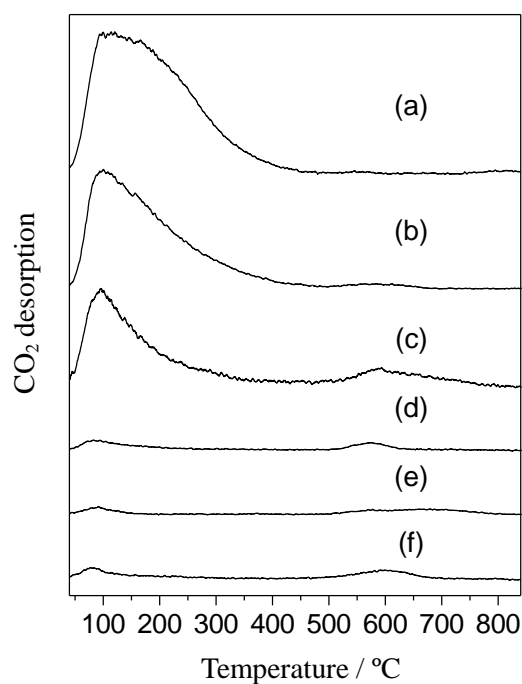

**Fig. S3** CO<sub>2</sub>-TPD profiles of the supported Ni catalysts: (a) CeO<sub>2</sub>, (b) ZrO<sub>2</sub>, (c) Al<sub>2</sub>O<sub>3</sub>, (d) TiO<sub>2</sub>, (e) SiO<sub>2</sub>-Al<sub>2</sub>O<sub>3</sub> and (f) SiO<sub>2</sub>.

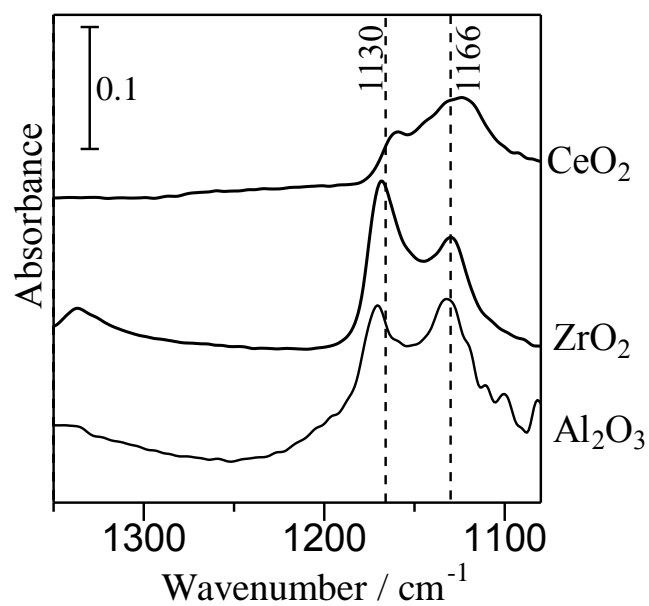

**Fig. S4** IR spectra of adsorbed species on metal oxides. The samples were exposed to 2-propanol (0.5 mmol g<sup>-1</sup>-catal.), followed by purging with He for 10 min.
